# Supplementary material for: Real-life clinical sensitivity of SARS-CoV-2 RT-PCR test in symptomatic patients
Source: bioRxiv or medRxiv preprint supplement (doi:10.1101/2020.11.01.20223107), 2020-11-04

**eTable 1.** List of SARS-CoV-2 RT-PCR testing criteria over the study period.

**eTable 2.** List of COVID-19 cohort wards. Inpatients were admitted to these COVID-19 cohort wards during the study period. Both laboratory confirmed and suspected COVID-19 patients were admitted to the cohort wards, except for two wards (COV\_KNKINF and COV\_KITEHO) to which only laboratory confirmed cases were admitted.

**eTable 3.** Estimated SARS-CoV-2 RT-PCR sensitivity values in the laboratory confirmed and high suspicion group combined according to specimen type in the first SARS-CoV-2 RT-PCR test.

**eTable 4.** Estimated SARS-CoV-2 RT-PCR sensitivity values in the laboratory confirmed, and in the laboratory confirmed and high suspicion group combined according to delay (days) from symptom onset to first SARS-CoV-2 RT-PCR test.

**eFigure 1.** Number of SARS-CoV-2 RT-PCR tests conducted at the HUSLAB Clinical Microbiology laboratory, and positivity rate over the study period 4 March – 15 April 2020. Median and mean positivity rates were 9.6% and 10%, respectively.

**eFigure 2.** Age distribution of the study population as histograms. A. Inpatients. B. Outpatients.

**eFigure 3** Delay to first SARS-CoV2 RT-PCR test (days) in the laboratory confirmed cases and the high suspicion group. A. Inpatients B. Outpatients.

**eFigure 4** Visualisation of clinical sensitivity estimates for inpatients and outpatients according to specimen type.

**eTable 1.** List of SARS-CoV-2 RT-PCR testing criteria over the study period.

| Time period                                          | SARS-CoV-2 testing criteria                                                                                                                                                                                                                                                                                                                                                                                                                                                                                 | Epidemic areas                                                                                        |
|------------------------------------------------------|-------------------------------------------------------------------------------------------------------------------------------------------------------------------------------------------------------------------------------------------------------------------------------------------------------------------------------------------------------------------------------------------------------------------------------------------------------------------------------------------------------------|-------------------------------------------------------------------------------------------------------|
| March 6 <sup>th</sup> - March 9 <sup>th</sup> 2020   | 1) Clinical picture of an acute respiratory infection: e.g. fever and/or cough and/or breathing difficulty and/or pneumonic imaging finding<br><br>AND 2) Possible exposure: travel to epidemic area or contact with laboratory confirmed<br><br>OR 3) Admission to ICU for respiratory infection, causative agent unknown                                                                                                                                                                                  | Mainland China, South Korea, Iran, Italy                                                              |
| March 9 <sup>th</sup> - March 15 <sup>th</sup> 2020  | Same as 6 March with an expanded epidemic area                                                                                                                                                                                                                                                                                                                                                                                                                                                              | Mainland China, South Korea, Iran, Italy, <i>Tyrol, Nordrhein-Westfalen (Germany)*</i>                |
| March 15 <sup>th</sup> - March 22 <sup>nd</sup> 2020 | 1) Quarantined individual experiencing symptoms of respiratory infection;<br><br>2) Admission to hospital for respiratory infection, causative agent unknown;<br><br>3) Individual over the age of 70 presenting with symptoms of respiratory infection;<br><br>4) Symptoms of respiratory infection AND possible exposure: travel or contact with lab. confirmed;<br><br>5) Nursing home resident with symptoms of respiratory infection AND suspicion of a respiratory infection epidemic in the facility | Italy, Tyrol<br><br>From 16 March onwards, all non-essential travel to and from Finland is prohibited |
| March 22 <sup>nd</sup> - April 13 <sup>th</sup> 2020 | Same as 15 March and 6) health care personnel with symptoms of respiratory infection                                                                                                                                                                                                                                                                                                                                                                                                                        | No designated epidemic areas; all travel considered a risk                                            |
| April 13 <sup>th</sup> 2020 onwards                  | 1) All individuals experiencing either respiratory or gastrointestinal symptoms;<br><br>2) Patients belonging to risk groups that are admitted to hospital for any reason                                                                                                                                                                                                                                                                                                                                   |                                                                                                       |

\*New areas in cursive

**eTable 2.** List of COVID-19 cohort wards. Inpatients were admitted to these COVID-19 cohort wards during the study period. Both laboratory confirmed and suspected COVID-19 patients were admitted to the cohort wards, except for two wards (COV\_KNKINF and COV\_KITEHO) to which only laboratory confirmed cases were admitted.

| Name of the ward | City      | Hospital               | Type of ward          | Date when started as a cohort ward |
|------------------|-----------|------------------------|-----------------------|------------------------------------|
| MEKINFOS         | Helsinki  | Meilahti hospital area | ward                  | 4.3.2020                           |
| MEKINFOSK4B      | Helsinki  | Meilahti hospital area | ward                  | 4.3.2020                           |
| MEKKEU6A         | Helsinki  | Meilahti hospital area | ward                  | 16.3.2020                          |
| MEKKEU6B         | Helsinki  | Meilahti hospital area | ward                  | 23.3.2020                          |
| COV_MEKOS5       | Helsinki  | Meilahti hospital area | ward                  | 1.4.2020                           |
| MAOS5            | Helsinki  | Malmi Hospital         | ward                  | 13.3.2020                          |
| PES4K            | Vantaa    | Peijas Hospital        | ward                  | 30.3.2020                          |
| JOKEU5           | Espoo     | Jorvi Hospital         | ward                  | 15.3.2020                          |
| HYINFB-4         | Hyvinkää  | Hyvinkää Hospital      | ward                  | 8.4.2020                           |
| RAUPPAVD         | Raasepori | Raasepori Hospital     | ward                  | 23.3.2020                          |
| COV_KNKINF       | Helsinki  | Surgical Hospital      | ward                  | 15.4.2020                          |
| COV_KITEHO       | Helsinki  | Surgical Hospital      | ICU                   | 9.4.2020                           |
| MEM1             | Helsinki  | Meilahti hospital area | ICU*                  | **                                 |
| PET              | Vantaa    | Peijas Hospital        | ICU*                  | **                                 |
| PEPV             | Vantaa    | Peijas Hospital        | ICU*                  | **                                 |
| JOU2             | Espoo     | Jorvi Hospital         | ICU*                  | **                                 |
| HYTEHVA          | Hyvinkää  | Hyvinkää Hospital      | ICU*                  | **                                 |
| POPPKL           | Porvoo    | Porvoo Hospital        | emergency department* | **                                 |

\*Due to lack of patient lists of ICUs or one cohort ward at Porvoo Hospital, all inpatients with SARS-CoV-2 RT-PCR taken at ICUs or at the emergency department of Porvoo Hospital were included.

\*\* All tests taken from 4 March to 15 April included.

**eTable 3.** Estimated SARS-CoV-2 RT-PCR sensitivity values in the laboratory confirmed and high suspicion group combined according to specimen type in the first SARS-CoV-2 RT-PCR test.

| <b>Specimen type*</b> | <b>Inpatients<br/>Sensitivity (95 % CI)</b> | <b>Outpatients<br/>Sensitivity (95 % CI)</b> | <b>All<br/>Sensitivity (95 % CI)</b> |
|-----------------------|---------------------------------------------|----------------------------------------------|--------------------------------------|
| Nasopharyngeal        | 195/274                                     | 154/458                                      | 349/732                              |
|                       | <b>71.2 %</b>                               | <b>33.6 %</b>                                | <b>47.7 %</b>                        |
|                       | (65.5 – 76.2 %)                             | (29.4 – 38.1 %)                              | (44.1 – 51.3 %)                      |
| Oropharyngeal         | 36/54                                       | 39/97                                        | 75/151                               |
|                       | <b>66.7 %</b>                               | <b>40.2 %</b>                                | <b>49.3 %</b>                        |
|                       | (53.4 – 77.8 %)                             | (31.0 – 50.2 %)                              | (41.5 – 57.2 %)                      |
| Not known             | 47/84                                       | 41/117                                       | 88/201                               |
|                       | <b>56.0 %</b>                               | <b>35.0 %</b>                                | <b>43.8 %</b>                        |
|                       | (45.3 – 66.1 %)                             | (27.0 – 44.0 %)                              | (37.1 – 50.7 %)                      |

\* Other sample types (Brocho-alveolar lavage, sputum, and tracheal aspirate) were excluded from analysis (n=4 for inpatients, n=2 for outpatients). Specimen type was unknown for 84 inpatients and 117 outpatients.

**eTable 4.** Estimated SARS-CoV-2 RT-PCR sensitivity values in the laboratory confirmed, and in the laboratory confirmed and high suspicion group combined according to delay (days) from symptom onset to first SARS-CoV-2 RT-PCR test.

| Delay (days) from symptom onset to sampling | No of patients with first RT-PCR positive | No of COVID-19 Laboratory confirmed patients | No of COVID-19 High suspicion patients | Total no of COVID-19 Laboratory confirmed and high suspicion patients | Sensitivity for COVID-19 Laboratory confirmed patients % (95 % CI) | Sensitivity for COVID-19 Laboratory confirmed + High suspicion patients % (95 % CI) |
|---------------------------------------------|-------------------------------------------|----------------------------------------------|----------------------------------------|-----------------------------------------------------------------------|--------------------------------------------------------------------|-------------------------------------------------------------------------------------|
| <1 day                                      | 29                                        | 37                                           | 21                                     | 58                                                                    | 78.4 (62.8 - 88.6)                                                 | 50.0 (37.5 - 62.5)                                                                  |
| 1-2 days                                    | 118                                       | 129                                          | 132                                    | 261                                                                   | 91.5 (85.4 - 95.2)                                                 | 45.2 (39.3 - 51.3)                                                                  |
| 3-4 days                                    | 96                                        | 102                                          | 99                                     | 201                                                                   | 94.1 (87.8 - 97.3)                                                 | 47.8 (41.0 - 54.6)                                                                  |
| 5-6 days                                    | 77                                        | 88                                           | 55                                     | 143                                                                   | 87.5 (79.0 - 92.9)                                                 | 53.8 (45.7 - 61.8)                                                                  |
| 7-14 days                                   | 153                                       | 172                                          | 136                                    | 308                                                                   | 89.0 (83.4 - 92.8)                                                 | 49.7 (44.1 - 55.2)                                                                  |
| >14 days                                    | 10                                        | 13                                           | 26                                     | 39                                                                    | 76.9 (49.7 - 91.8)                                                 | 25.6 (14.6 - 41.1)                                                                  |
| No data                                     | 33                                        | 33                                           | 47                                     | 80                                                                    | 100 (89.6 - 100)                                                   | 41.2 (31.1 - 52.2)                                                                  |
| Total                                       | 516                                       | 574                                          | 516                                    | 1090                                                                  | 89.9 (87.2 - 92.1)                                                 | 47.3 (44.4 - 50.3)                                                                  |

**eFigure 1.** Number of SARS-CoV-2 RT-PCR tests conducted at the HUSLAB Clinical Microbiology laboratory, and positivity rate over the study period 4 March – 15 April 2020. Median and mean positivity rates were 9.6% and 10%, respectively.

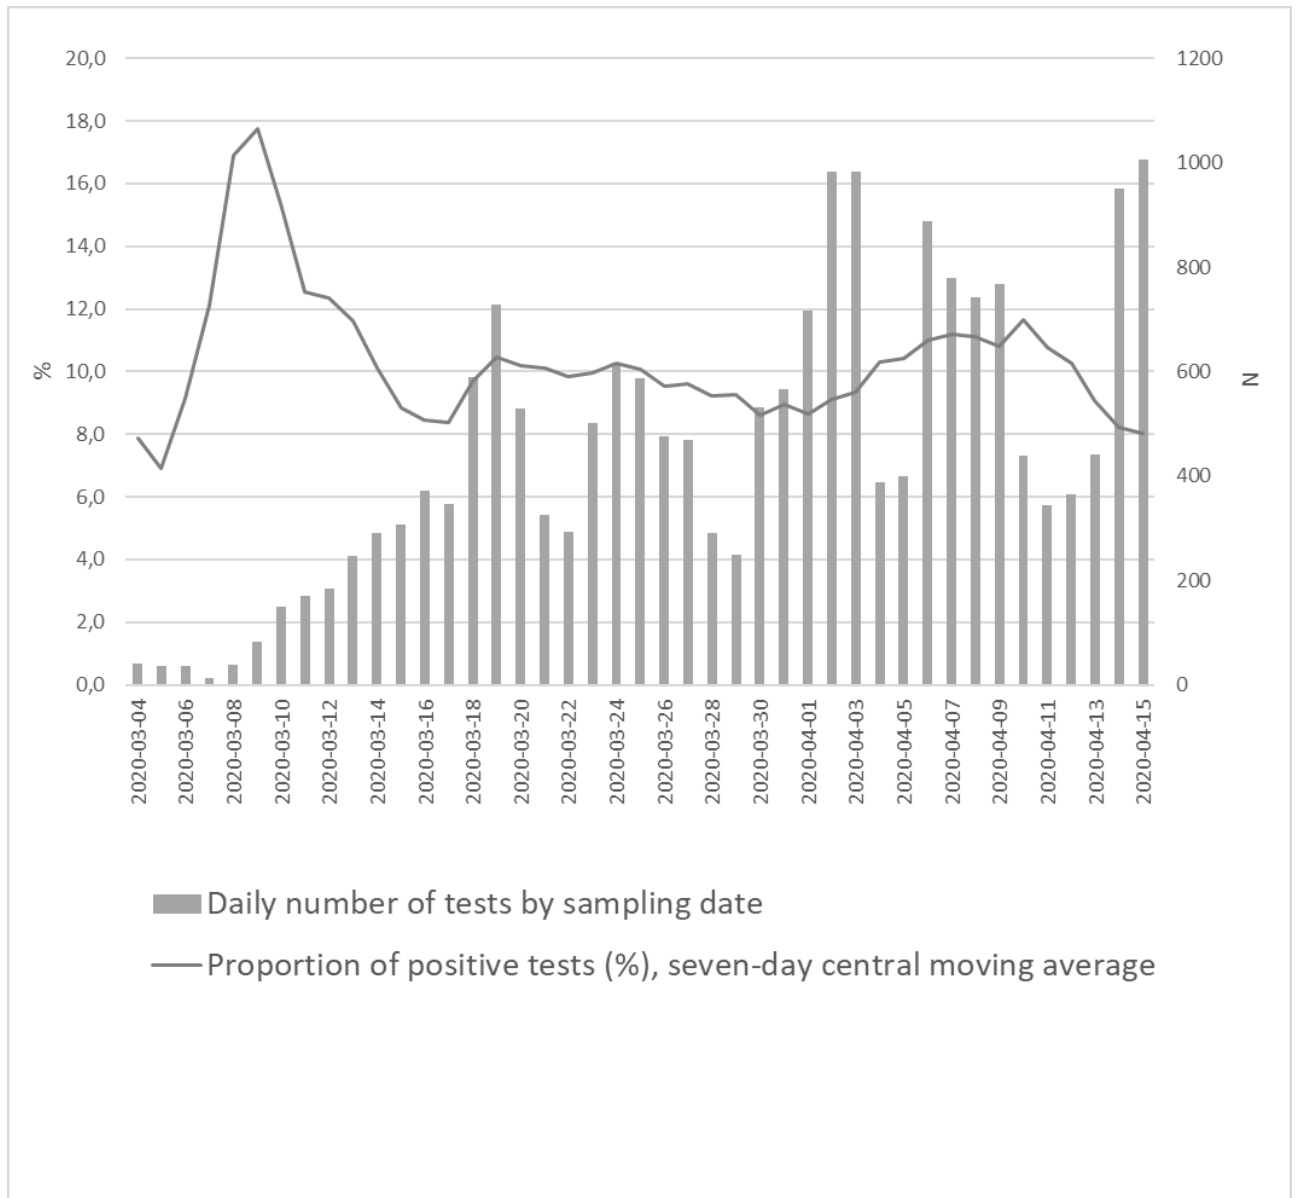

**eFigure 2.** Age distribution of the study population as histograms. A. Inpatients. B. Outpatients.

A

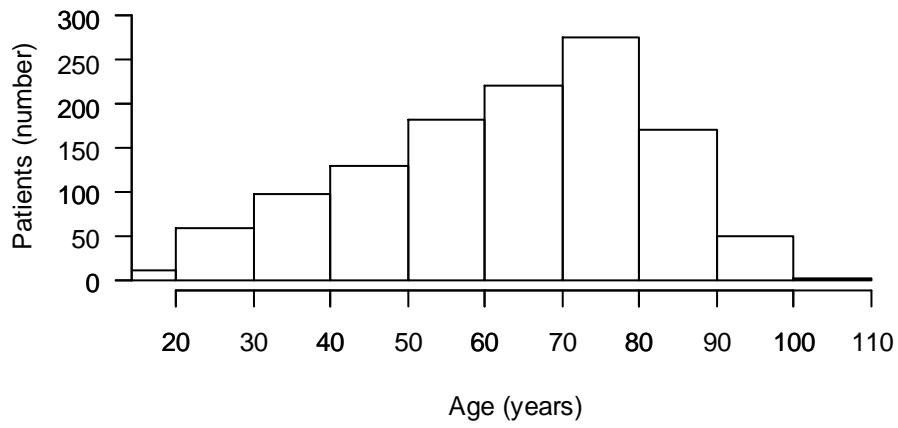

B

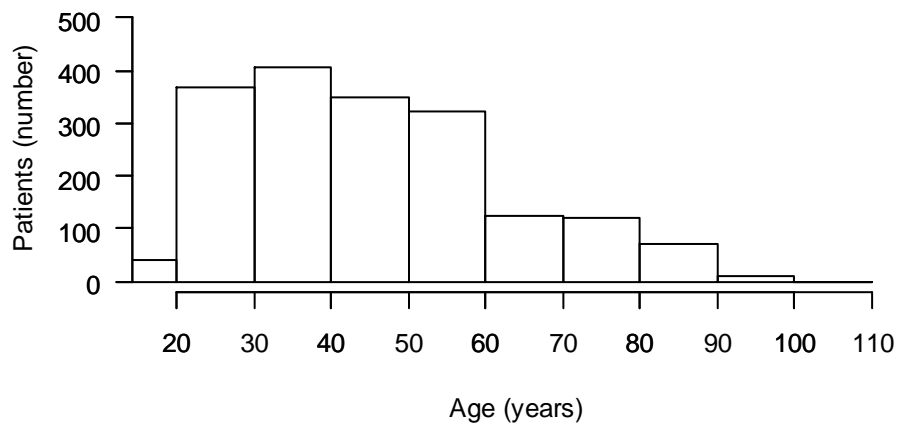

**eFigure 3** Delay to first SARS-CoV2 RT-PCR test (days) in the laboratory confirmed cases and the high suspicion group. A. Inpatients B. Outpatients.

A

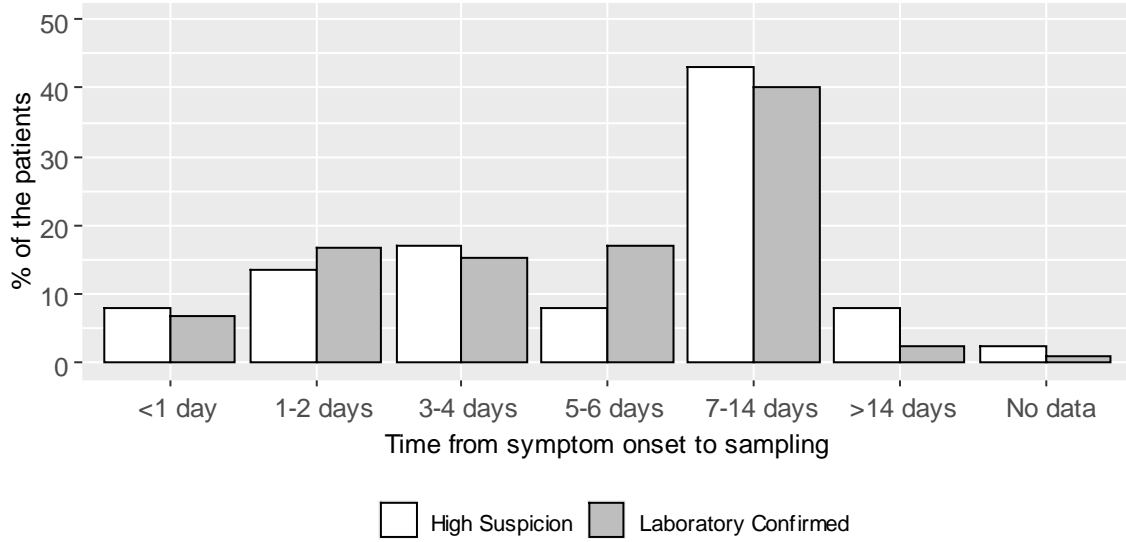

B

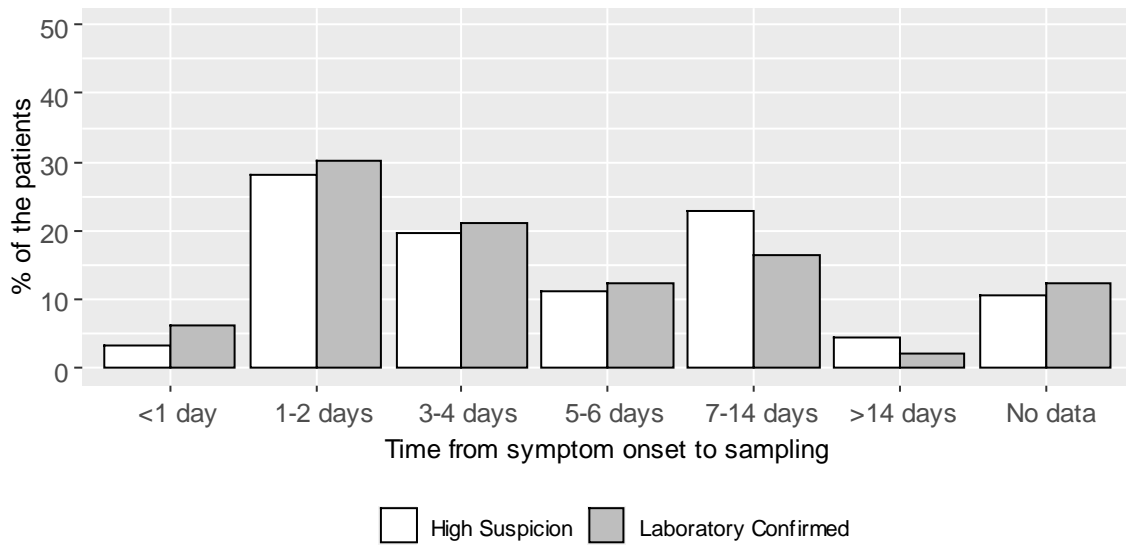



**eFigure 4** Visualisation of clinical sensitivity estimates for inpatients and outpatients according to specimen type.

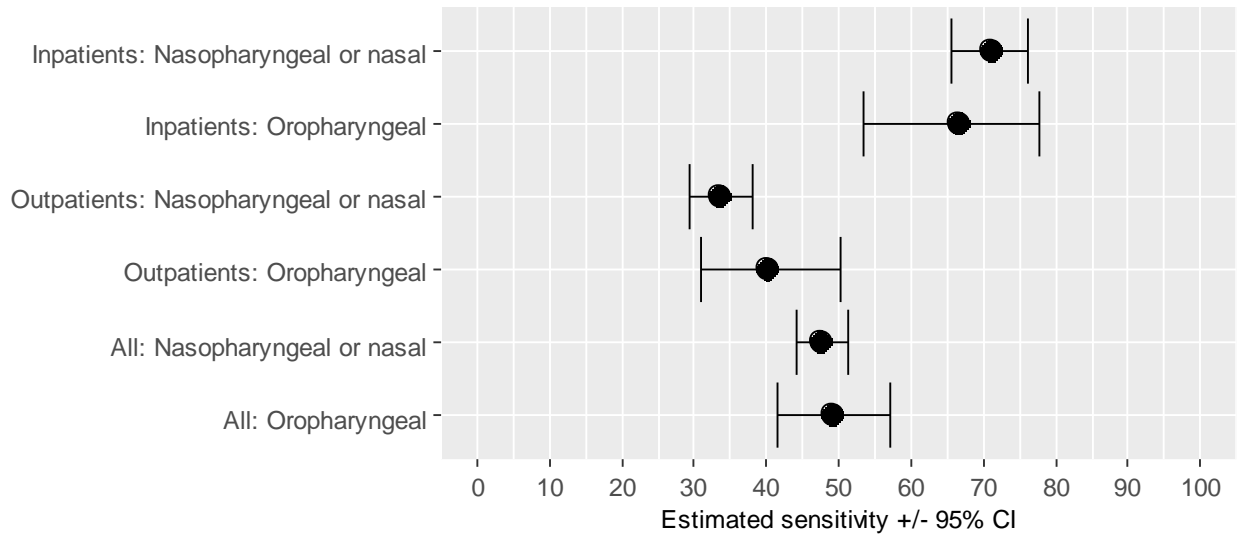

Supplement: Supplementary file [file media-1.pdf]
